# Supplementary material for: Molecular structure simplification of the most common hole transport materials in perovskite solar cells
Source: Royal Society of Chemistry journal article supplement (doi:10.1039/c6ra21448g), 2016-01-01
Supplement: c6ra21448g1.pdf [file c6ra21448g1.pdf]

**Electronic Supplementary Information (ESI) for**

**Molecular Structure Simplification of the  
Most Common Hole Transport Material in  
Perovskite Solar Cells**

Yantao Shi,<sup>\*,a</sup> Yuan Xue,<sup>a</sup> Kaili Hou,<sup>a</sup> Guanghao Meng,<sup>a</sup> Kai Wang,<sup>a</sup>  
Rihan Chi,<sup>a</sup> Fan Chen,<sup>a</sup> Huicai Ren,<sup>b</sup> Maoyin Pang,<sup>b</sup> Ce Hao<sup>\*,a</sup>

<sup>a</sup> State Key Laboratory of Fine Chemicals, School of Chemistry, Dalian  
University of Technology, Dalian, 116024, China.

E-mail: shiyantao@dlut.edu.cn; haoce@dlut.edu.cn

<sup>b</sup> Valiant Corporation Limited, Yantai, 264000, China.

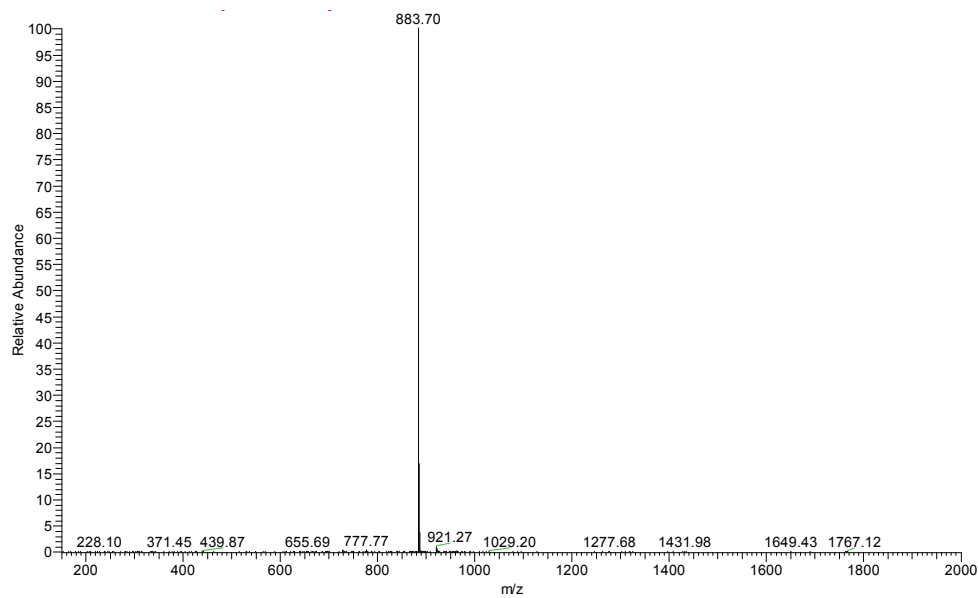

Fig. S1. LC-MS spectrum of spiro-027

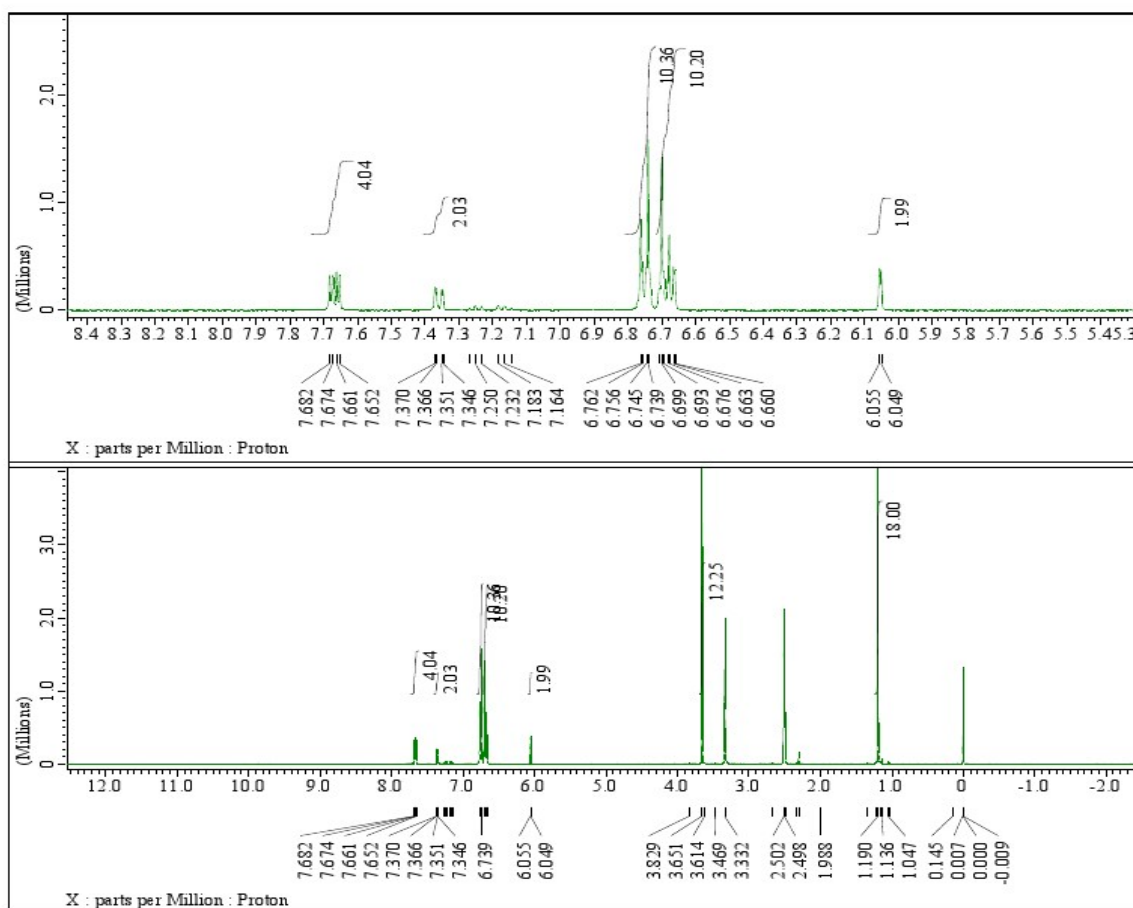

Fig. S2.  $^1\text{H}$ NMR spectrum of spiro-027

**Table S1.** Values of the photovoltaic parameters of 30 devices based on spiro-027 and spiro-OMeTAD .

| HTM       | $V_{OC}$ (V) | $J_{SC}$ (mA cm <sup>-2</sup> ) | FF   | PCE (%) |
|-----------|--------------|---------------------------------|------|---------|
| Spiro-027 | 1.06         | 21.02                           | 0.69 | 15.31   |
|           | 1.06         | 20.72                           | 0.70 | 15.34   |
|           | 1.06         | 21.49                           | 0.69 | 15.72   |
|           | 1.08         | 20.39                           | 0.68 | 14.97   |
|           | 1.08         | 20.66                           | 0.68 | 15.25   |
|           | 1.06         | 22.17                           | 0.64 | 14.93   |
|           | 1.07         | 21.67                           | 0.71 | 16.41   |
|           | 1.07         | 22.07                           | 0.70 | 16.60   |
|           | 1.06         | 22.02                           | 0.65 | 15.22   |
|           | 1.04         | 21.23                           | 0.70 | 15.38   |
|           | 1.05         | 21.98                           | 0.64 | 14.79   |
|           | 1.06         | 21.71                           | 0.67 | 15.51   |
|           | 1.05         | 22.49                           | 0.68 | 15.98   |
|           | 1.05         | 21.12                           | 0.70 | 15.54   |
|           | 1.06         | 21.43                           | 0.70 | 15.97   |
|           | 1.02         | 20.84                           | 0.68 | 14.52   |
|           | 1.02         | 21.23                           | 0.67 | 14.54   |
|           | 1.01         | 21.05                           | 0.69 | 14.81   |
|           | 1.03         | 20.04                           | 0.71 | 14.63   |
|           | 1.03         | 20.63                           | 0.69 | 14.74   |
|           | 0.99         | 22.46                           | 0.67 | 14.90   |
|           | 1.04         | 20.75                           | 0.67 | 14.52   |
|           | 1.05         | 21.45                           | 0.68 | 15.30   |
|           | 1.04         | 21.14                           | 0.68 | 15.04   |
|           | 1.04         | 21.50                           | 0.65 | 14.61   |
|           | 1.03         | 22.24                           | 0.69 | 15.88   |
|           | 1.04         | 22.00                           | 0.69 | 15.86   |
|           | 1.06         | 21.43                           | 0.70 | 15.89   |
|           | 1.05         | 20.80                           | 0.70 | 15.34   |
|           | 1.05         | 21.07                           | 0.70 | 15.53   |

| HTM          | $V_{oc}$ (V) | $J_{sc}$ (mA cm <sup>-2</sup> ) | FF   | PCE (%) |
|--------------|--------------|---------------------------------|------|---------|
| Spiro-OMeTAD | 1.06         | 20.78                           | 0.70 | 15.50   |
|              | 1.06         | 20.93                           | 0.71 | 15.82   |
|              | 1.06         | 20.54                           | 0.68 | 14.77   |
|              | 1.05         | 20.32                           | 0.69 | 14.66   |
|              | 1.06         | 21.12                           | 0.71 | 15.86   |
|              | 1.07         | 20.54                           | 0.71 | 15.60   |
|              | 1.06         | 20.77                           | 0.69 | 15.25   |
|              | 1.07         | 20.88                           | 0.71 | 15.95   |
|              | 1.03         | 22.09                           | 0.65 | 14.84   |
|              | 1.04         | 21.48                           | 0.69 | 15.42   |
|              | 1.04         | 21.74                           | 0.70 | 15.73   |
|              | 1.05         | 20.30                           | 0.70 | 14.96   |
|              | 1.05         | 20.92                           | 0.70 | 15.42   |
|              | 1.04         | 20.58                           | 0.70 | 14.89   |
|              | 1.05         | 21.45                           | 0.70 | 15.76   |
|              | 1.04         | 21.85                           | 0.70 | 16.05   |
|              | 1.03         | 22.67                           | 0.62 | 14.60   |
|              | 1.06         | 20.89                           | 0.70 | 15.40   |
|              | 1.06         | 21.47                           | 0.71 | 16.12   |
|              | 1.07         | 21.08                           | 0.68 | 15.20   |
|              | 1.04         | 20.14                           | 0.70 | 14.65   |
|              | 1.06         | 20.78                           | 0.69 | 15.13   |
|              | 1.07         | 20.75                           | 0.69 | 15.32   |
|              | 1.05         | 21.05                           | 0.70 | 15.44   |
|              | 1.05         | 20.62                           | 0.70 | 15.22   |
|              | 1.02         | 21.45                           | 0.67 | 14.75   |
|              | 1.06         | 20.74                           | 0.71 | 15.59   |
|              | 1.05         | 20.99                           | 0.71 | 15.64   |
|              | 1.07         | 20.31                           | 0.70 | 15.13   |
|              | 1.04         | 20.54                           | 0.70 | 14.91   |
